# Supplementary material for: Differentiated fibrocytes assume a functional mesenchymal phenotype with regenerative potential
Source: PubMed Central journal article supplement — Sci Adv. 2019 May 8;5(5):eaav7384. doi: 10.1126/sciadv.aav7384 (PMC6506241; doi:10.1126/sciadv.aav7384), 2019-05-08
Supplement: aav7384_SM.pdf [file aav7384_SM.pdf]

## Supplementary Materials for

### **Differentiated fibrocytes assume a functional mesenchymal phenotype with regenerative potential**

Changying Ling, Kohei Nishimoto, Zach Rolfs, Lloyd M. Smith, Brian L. Frey, Nathan V. Welham\*

\*Corresponding author. Email: welham@surgery.wisc.edu

Published 8 May 2019, *Sci. Adv.* **5**, eaav7384 (2019)

DOI: 10.1126/sciadv.aav7384

#### **This PDF file includes:**

Fig. S1. Additional characterization of human FC differentiation in vitro.

Fig. S2. Bioenergetic profiles of human FCs at 1 and 7 days.

Fig. S3. Characterization of monocytes following epithelial cell-oriented culture.

Table S1. Reactome pathways enriched in protein sets associated with FC differentiation.

Table S2. Reactome pathways enriched in the protein set overrepresented in VFFs, DFs, and MSCs compared to FCs.

Table S3. Reactome pathways enriched in the protein set overrepresented in FCs compared to VFFs, DFs, and MSCs.

Table S4. Cytokine production by FCs and VFFs, cultured under basal conditions for 24 hours.

Table S5. Antibodies and isotype controls used for flow cytometry.

Table S6. Antibodies and phalloxin used for immunocytochemistry and immunohistochemistry.

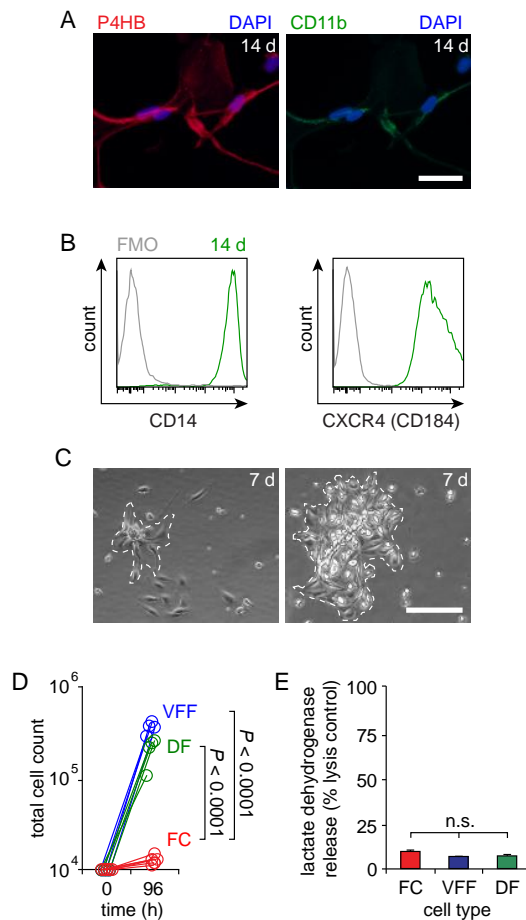

**Fig. S1. Additional characterization of human FC differentiation *in vitro*.** (A) P4HB and CD11b immunostaining patterns at 14 d. Scale bar, 50  $\mu$ m. (B) CD14 and CXCR4 (CD184) expression at 14 d. FMO controls are shown in gray. (C) Phase-contrast images of FC colonies at 7 d. The left image shows a typically sized 10–20 cell colony; the right image shows a rarely observed ~100 cell colony. White dashed lines indicate the boundary of each colony. Scale bar, 100  $\mu$ m. (D) Cell count data showing FC proliferation over 96 h, compared to DF and VFF. *P* values were calculated using ANOVA (*n* = 4–6 per condition). (E) Lactate dehydrogenase release by FCs, DFs, and VFFs. Data are shown as mean  $\pm$  s.e.m. Statistical testing was performed using ANOVA (*n* = 4 per condition).

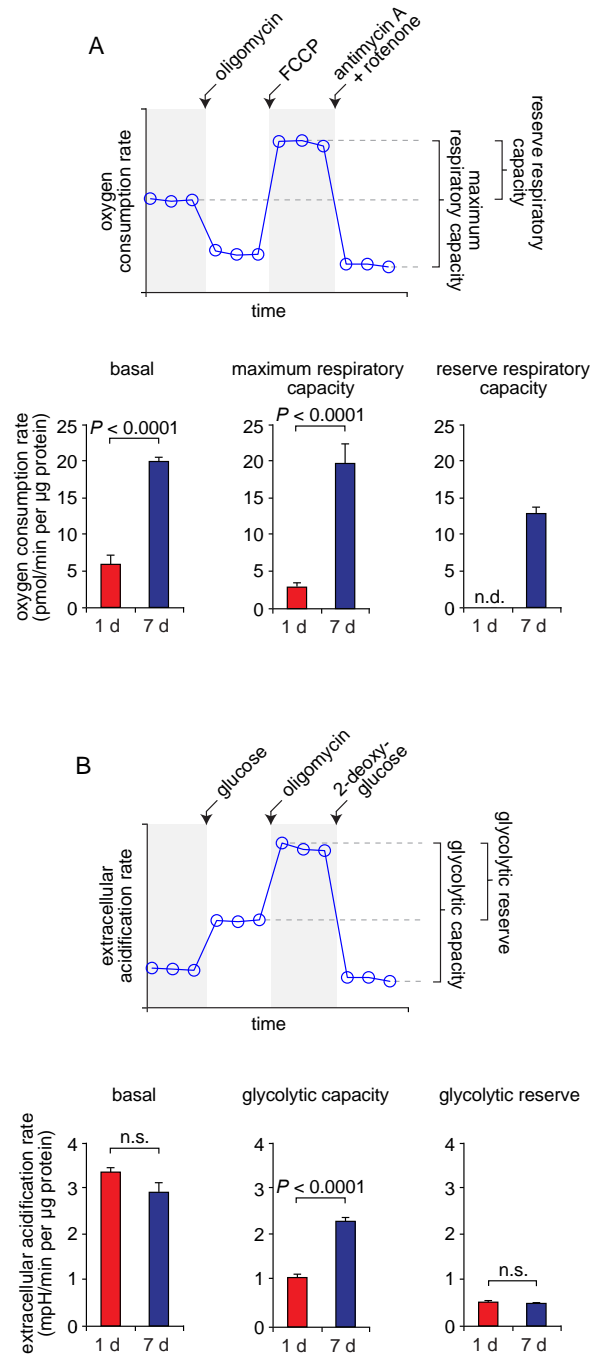

**Fig. S2. Bioenergetic profiles of human FCs at 1 and 7 days.** (A) Analysis of mitochondrial respiration. The time-course schematic illustrates the calculation of maximum and reserve respiratory capacities from changes in real-time oxygen consumption rate. Data in the bar graphs (derived from the real-time plots in Fig. 2H) are shown as mean  $\pm$  s.e.m.  $P$  values were calculated using a Student's  $t$  test ( $n = 10$  per condition). (B) Analysis of glycolysis. The time-course schematic illustrates the calculation of glycolytic capacity and reserve from changes in real-time extracellular acidification rate. Data in the bar graphs (derived from the real-time plots in Fig. 2I) are shown as mean  $\pm$  s.e.m.  $P$  values were calculated using a Student's  $t$  test ( $n = 4$  per condition).

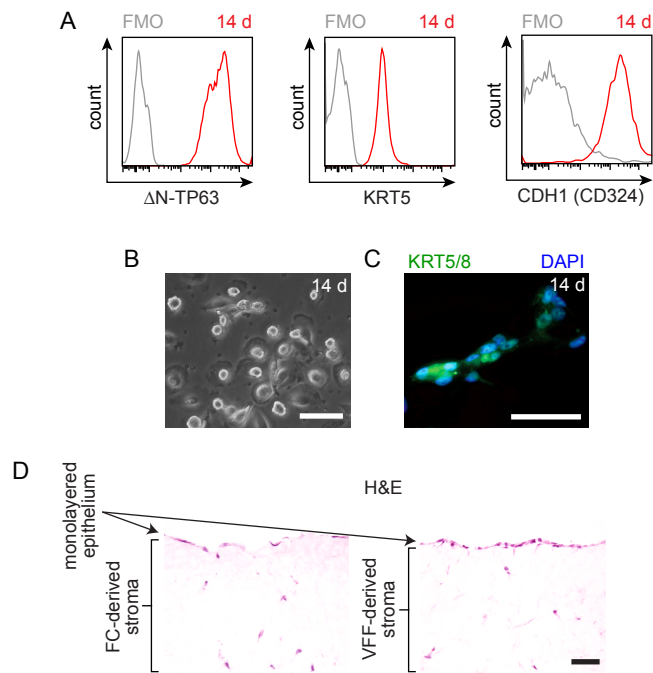

**Fig. S3. Characterization of monocytes following epithelial cell-oriented culture.** (A)  $\Delta$ N-TP63, KRT5, and CDH1 (CD324) expression at 14 d. FMO controls are shown in gray. (B) Phase-contrast image showing cell morphology at 14 d. Scale bar, 50  $\mu$ m. (C) KRT5/8 immunostaining pattern in a cellular chain at 14 d. Scale bar, 50  $\mu$ m. (D) H&E-stained sections showing morphology of engineered tissues generated using monocyte-derived epithelial cells and either FCs or VFFs as the stromal cell source. Scale bar, 50  $\mu$ m.

**Table S1. Reactome pathways enriched in protein sets associated with FC differentiation.** Pathways were identified using the Enrichr algorithm based on a Benjamini Hochberg-adjusted *P* value < 0.01 and minimum of 4 protein identifications per pathway. Pathways are listed in order of ascending adjusted *P* value; significant pathways associated with the initial 7 d differentiation period are also presented in Fig. 2G.

| Reactome pathway                                                 | Description                 | Proteins                                                                             | Adjusted <i>P</i> value |
|------------------------------------------------------------------|-----------------------------|--------------------------------------------------------------------------------------|-------------------------|
| <u>Proteins with increased abundance at 1 d compared to 7 d</u>  |                             |                                                                                      |                         |
| <i>No significantly enriched pathways</i>                        |                             |                                                                                      |                         |
| <u>Proteins with increased abundance at 1 d compared to 14 d</u> |                             |                                                                                      |                         |
| R-HSA-109582                                                     | Hemostasis                  | SERPINB2; ITGA2B; F13A1; HBB; PPBP; HBD                                              | 7.93E-03                |
| <u>Proteins with increased abundance at 7 d compared to 1 d</u>  |                             |                                                                                      |                         |
| R-HSA-1430728                                                    | Metabolism                  | POR; ASAH1; NCEH1; ACSL1; GAA; ALDH1A1; EPHX1; ACP5; MAN2B1; FBP1                    | 9.95E-04                |
| R-HSA-71387                                                      | Metabolism of carbohydrates | GAA; ALDH1A1; MAN2B1; FBP1                                                           | 3.54E-03                |
| <u>Proteins with increased abundance at 7 d compared to 14 d</u> |                             |                                                                                      |                         |
| <i>No significantly enriched pathways</i>                        |                             |                                                                                      |                         |
| <u>Proteins with increased abundance at 14 d compared to 1 d</u> |                             |                                                                                      |                         |
| R-HSA-1430728                                                    | Metabolism                  | GSTM4; ASAH1; GAA; EPHX1; ALDH3A2; GRHPR; PC; NCEH1; SCP2; ALDH1A1; APOE; MGLL; PCK2 | 3.08E-03                |
| <u>Proteins with increased abundance at 14 d compared to 7 d</u> |                             |                                                                                      |                         |
| <i>No significantly enriched pathways</i>                        |                             |                                                                                      |                         |

**Table S2. Reactome pathways enriched in the protein set overrepresented in VFFs, DFs, and MSCs compared to FCs.** Pathways were identified using the Enrichr algorithm based on a Benjamini Hochberg-adjusted *P* value < 0.01 and minimum of 4 protein identifications per pathway. Pathways are listed in order of ascending adjusted *P* value; the top three pathways are also presented in Fig. 3C.

| Reactome pathway | Description                                                  | Proteins                                                                                                                                                                          | Adjusted <i>P</i> value |
|------------------|--------------------------------------------------------------|-----------------------------------------------------------------------------------------------------------------------------------------------------------------------------------|-------------------------|
| R-HSA-1650814    | Collagen biosynthesis and modifying enzymes                  | CRTAP; COL12A1; PLOD2; PLOD1; COL1A1; COL3A1; COL1A2; P4HA1; COL5A1; P4HA2; COL6A2; COL6A1; SERPINH1; COL6A3                                                                      | 1.87E-11                |
| R-HSA-1474244    | Extracellular matrix organization                            | ITGB1; CRTAP; SPARC; ITGA3; LAMB2; COL12A1; PRKCA; PLOD2; LAMB1; PLOD1; LAMC1; COL1A1; COL3A1; COL1A2; P4HA1; COL5A1; P4HA2; COL6A2; COL6A1; SERPINH1; COL6A3; ITGAV; ITGA5       | 3.03E-10                |
| R-HSA-1474290    | Collagen formation                                           | CRTAP; COL12A1; PLOD2; PLOD1; COL1A1; COL3A1; COL1A2; P4HA1; COL5A1; P4HA2; COL6A2; COL6A1; SERPINH1; COL6A3                                                                      | 5.00E-10                |
| R-HSA-176974     | Unwinding of DNA                                             | MCM7; MCM3; MCM4; MCM5; MCM6; MCM2                                                                                                                                                | 5.15E-07                |
| R-HSA-68962      | Activation of the pre-replicative complex                    | MCM7; CDK2; MCM3; MCM4; MCM5; MCM6; MCM2                                                                                                                                          | 9.05E-06                |
| R-HSA-69190      | DNA strand elongation                                        | PCNA; MCM7; MCM3; MCM4; MCM5; MCM6; MCM2                                                                                                                                          | 1.22E-05                |
| R-HSA-176187     | Activation of ATR in response to replication stress          | MCM7; CDK2; MCM3; MCM4; MCM5; MCM6; MCM2                                                                                                                                          | 2.66E-05                |
| R-HSA-3000157    | Laminin interactions                                         | ITGB1; ITGA3; LAMB2; LAMB1; ITGAV; LAMC1                                                                                                                                          | 2.66E-05                |
| R-HSA-422475     | Axon guidance                                                | ITGB1; PDGFRB; CAMK2D; LAMB1; AP2B1; LAMC1; RHOC; ENAH; ALCAM; PSME3; COL6A2; DPYSL3; COL6A1; COL6A3; ITGAV; ITGA5; MYL9; SPTAN1; MYH10; SPTBN1; VCL; PFN2                        | 3.31E-05                |
| R-HSA-69206      | G1/S transition                                              | PCNA; MCM7; PSME3; CDK2; MCM3; MCM4; MCM5; MCM6; SKP1; MCM2                                                                                                                       | 8.85E-05                |
| R-HSA-1640170    | Cell cycle                                                   | PPP1R12A; PCNA; MCM7; NUMA1; PRKCA; LEMD3; RANGAP1; SMC2; NUP93; PSME3; RUVBL2; CDK2; MCM3; MCM4; NCAPD2; MCM5; RBBP7; MCM6; TP53BP1; EMD; MCM2; SKP1                             | 1.27E-04                |
| R-HSA-68949      | Orc1 removal from chromatin                                  | MCM7; PSME3; CDK2; MCM3; MCM4; MCM5; MCM6; MCM2                                                                                                                                   | 1.27E-04                |
| R-HSA-69052      | Switching of origins to a post-replicative state             | MCM7; PSME3; CDK2; MCM3; MCM4; MCM5; MCM6; MCM2                                                                                                                                   | 1.27E-04                |
| R-HSA-69239      | Synthesis of DNA                                             | PCNA; MCM7; PSME3; CDK2; MCM3; MCM4; MCM5; MCM6; MCM2                                                                                                                             | 1.32E-04                |
| R-HSA-69300      | Removal of licensing factors from origins                    | MCM7; PSME3; CDK2; MCM3; MCM4; MCM5; MCM6; MCM2                                                                                                                                   | 1.32E-04                |
| R-HSA-69242      | S Phase                                                      | PCNA; MCM7; PSME3; CDK2; MCM3; MCM4; MCM5; MCM6; SKP1; MCM2                                                                                                                       | 1.32E-04                |
| R-HSA-373760     | L1CAM interactions                                           | ITGB1; ALCAM; LAMB1; ITGAV; ITGA5; LAMC1; AP2B1; SPTAN1; SPTBN1                                                                                                                   | 1.32E-04                |
| R-HSA-69304      | Regulation of DNA replication                                | MCM7; PSME3; CDK2; MCM3; MCM4; MCM5; MCM6; MCM2                                                                                                                                   | 1.55E-04                |
| R-HSA-2022090    | Assembly of collagen fibrils and other multimeric structures | COL1A1; COL3A1; COL1A2; COL5A1; COL6A2; COL6A1; COL6A3                                                                                                                            | 1.62E-04                |
| R-HSA-69278      | Cell cycle, mitotic                                          | PPP1R12A; PCNA; MCM7; NUMA1; PRKCA; LEMD3; RANGAP1; SMC2; NUP93; PSME3; CDK2; MCM3; MCM4; NCAPD2; MCM5; MCM6; EMD; MCM2; SKP1                                                     | 1.64E-04                |
| R-HSA-5627123    | RHO GTPases activate PAKs                                    | PPP1R12A; CTTN; MYH10; MYL9; MYLK                                                                                                                                                 | 1.64E-04                |
| R-HSA-69306      | DNA replication                                              | PCNA; MCM7; PSME3; CDK2; MCM3; MCM4; MCM5; MCM6; MCM2                                                                                                                             | 1.95E-04                |
| R-HSA-68874      | M/G1 transition                                              | MCM7; PSME3; CDK2; MCM3; MCM4; MCM5; MCM6; MCM2                                                                                                                                   | 2.19E-04                |
| R-HSA-69002      | DNA replication pre-initiation                               | MCM7; PSME3; CDK2; MCM3; MCM4; MCM5; MCM6; MCM2                                                                                                                                   | 2.19E-04                |
| R-HSA-453279     | Mitotic G1-G1/S phases                                       | PCNA; MCM7; PSME3; CDK2; MCM3; MCM4; MCM5; MCM6; SKP1; MCM2                                                                                                                       | 2.19E-04                |
| R-HSA-3000171    | Non-integrin membrane-ECM interactions                       | ITGB1; LAMB2; LAMB1; PRKCA; ITGAV; LAMC1                                                                                                                                          | 3.31E-04                |
| R-HSA-1266738    | Developmental biology                                        | ITGB1; CAMK2D; LAMC1; ALCAM; DPYSL3; CTNNA1; ITGAV; RBBP7; SPTAN1; MYH10; SPTBN1; PDGFRB; LAMB1; AP2B1; RHOC; ENAH; PSME3; COL6A2; COL6A1; CTNNA1; COL6A3; ITGA5; MYL9; VCL; PFN2 | 3.56E-04                |
| R-HSA-68867      | Assembly of the pre-replicative complex                      | MCM7; PSME3; MCM3; MCM4; MCM5; MCM6; MCM2                                                                                                                                         | 4.70E-04                |
| R-HSA-445355     | Smooth muscle contraction                                    | CALD1; TPM1; MYL9; VCL; MYLK                                                                                                                                                      | 1.19E-03                |
| R-HSA-5627117    | RHO GTPases activate ROCKs                                   | PPP1R12A; RHOC; MYH10; MYL9                                                                                                                                                       | 1.19E-03                |
| R-HSA-3000178    | ECM proteoglycans                                            | ITGB1; SPARC; LAMB2; LAMB1; ITGAV; LAMC1                                                                                                                                          | 1.35E-03                |

---

|               |                                                      |                                                                                     |          |
|---------------|------------------------------------------------------|-------------------------------------------------------------------------------------|----------|
| R-HSA-195258  | RHO GTPase effectors                                 | ITGB1; PPP1R12A; KLC2; CTTN; CTNNA1; CTNNB1; RHOC; RANGAP1; MYL9; MYH10; PFN2; MYLK | 1.77E-03 |
| R-HSA-69481   | G2/M checkpoints                                     | MCM7; PSME3; CDK2; MCM3; MCM4; MCM5; TP53BP1; MCM6; MCM2                            | 2.23E-03 |
| R-HSA-5250913 | Positive epigenetic regulation of rRNA expression    | MYO1C; POLR1C; DDX21; CHD4; DEK; RBBP7                                              | 6.00E-03 |
| R-HSA-389957  | Prefoldin mediated transfer of substrate to CCT/TriC | TUBB6; TUBB2A; TUBB3; PFDN1                                                         | 6.65E-03 |
| R-HSA-75153   | Apoptotic execution phase                            | TJP1; CTNNB1; SPTAN1; ADD1; HIST1H1C                                                | 8.19E-03 |
| R-HSA-69620   | Cell cycle checkpoints                               | MCM7; PSME3; CDK2; MCM3; MCM4; MCM5; TP53BP1; MCM6; MCM2                            | 8.48E-03 |

---

**Table S3. Reactome pathways enriched in the protein set overrepresented in FCs compared to VFFs, DFs, and MSCs.** Pathways were identified using the Enrichr algorithm based on a Benjamini Hochberg-adjusted *P* value < 0.01 and minimum of 4 protein identifications per pathway. Pathways are listed in order of ascending adjusted *P* value; the top three pathways are also presented in Fig. 3C.

| Reactome pathway | Description                                                       | Proteins                                                                                                                                                                                                                                                                                                                                                                                                                                                                                                                                                                                                                                          | Adjusted <i>P</i> value |
|------------------|-------------------------------------------------------------------|---------------------------------------------------------------------------------------------------------------------------------------------------------------------------------------------------------------------------------------------------------------------------------------------------------------------------------------------------------------------------------------------------------------------------------------------------------------------------------------------------------------------------------------------------------------------------------------------------------------------------------------------------|-------------------------|
| R-HSA-1430728    | Metabolism                                                        | SLC25A1; CDA; ARF1; ADPGK; HEXB; HEXA; ATP5C1; HBB; AKR1B1; PYGL; SQRDL; HNMT; CNRP2; HK3; IL4I1; CPT2; GM2A; ALDH2; CA2; KYNU; BSG; NAMPT; ME1; ACP5; CYP1B1; CD36; GUSB; GSTK1; G6PD; GPX1; GPX4; GSTO1; ACSL1; GAA; MCCC1; AKR1A1; ACOT13; TALDO1; PGD; ASRGL1; CYP27A1; ALDH3A2; POR; ALDH1A1; PSME1; PLBD1; BLVRB; PLIN2; FBP1; FBP2; PI4K2A; MGLL; BLVRA; CES1; PDXK; ASAH1; MGST3; HSD17B4; GLRX; HSD17B11; UQCRH; PSMB10; PLD3; GNAI2; TYMP; SULT1A1; CYB5R1; ALOX5; INPP5D; PSAP; PGK1; PLCG2; LTA4H; APOE; CYB5A; PDHA1; GK; PTGES3; IDH1; GSR; IDH2; EPHX1; AKR1C3; FAH; PSMB8; DERA; GCLC; PC; FABP5; GLB1; TBXAS1; PPT1; MAN2B1; GLA | 2.66E-26                |
| R-HSA-1222556    | ROS, RNS production in response to bacteria                       | ATP6V1A; ATP6V1G1; NCF1; NCF2; NCF4; CYBB; CYBA; TCIRG1; ATP6V1B2; ATP6V1H; ATP6V1E1; ATP6V0C; ATP6V0D2; ATP6V1D; ATP6V1C1; ATP6V0A1                                                                                                                                                                                                                                                                                                                                                                                                                                                                                                              | 6.71E-19                |
| R-HSA-168256     | Immune system                                                     | CYFIP1; ARF1; ITGAM; NCF1; NCF2; ARPC1B; ITGB2; NCF4; PEBP1; ARRB1; TCIRG1; ITGAL; IFI30; AP2A2; CTSS; PYCARD; LGALS3; CASP1; CTSH; LGALS9; CD36; ATP6V1E1; CTSD; B2M; CTSB; ACTR3; ATP6V1G1; FCER1G; SYK; PRKCD; AP1B1; HLA-B; CYBB; IL16; CYBA; HLA-A; FGR; HCK; TYROBP; ATP6V1B2; PSME1; ELMO2; EVL; ATP6V0D2; ATP6V0C; RAB7A; ATP6V1A; WAS; SAMHD1; PSMB10; PLD3; HLA-DMB; INPP5D; PLCG2; ATP6V1H; NCKAP1L; CD14; ATG7; ATP6V1D; ATP6V1C1; ATP6V0A1; LYN; CD74; HLA-DRB4; LILRB2; PSMB8; PTPRC; ARPC2; HLA-DPB1; HLA-DRA; PTPN6; HLA-DRB1                                                                                                     | 4.61E-18                |
| R-HSA-917937     | Iron uptake and transport                                         | ATP6V1A; ATP6V1G1; STEAP3; TCIRG1; FTH1; ATP6V1B2; ATP6V1H; ATP6V1E1; ATP6V0C; ATP6V0D2; ATP6V1D; ATP6V1C1; FTL; ATP6V0A1                                                                                                                                                                                                                                                                                                                                                                                                                                                                                                                         | 5.94E-14                |
| R-HSA-917977     | Transferrin endocytosis and recycling                             | ATP6V1A; ATP6V1G1; STEAP3; ATP6V1B2; ATP6V1H; TCIRG1; ATP6V1E1; ATP6V0C; ATP6V0D2; ATP6V1D; ATP6V1C1; ATP6V0A1                                                                                                                                                                                                                                                                                                                                                                                                                                                                                                                                    | 2.06E-13                |
| R-HSA-109582     | Hemostasis                                                        | CD84; ITGAM; ITGB2; PLEK; GNAI3; HBB; ARRB1; PRCP; ITGAL; GNAI2; ABHD12; CYB5R1; INPP5D; PSAP; BSG; PLCG2; ITGAX; RAC2; SIRPA; CD36; LYN; CAP1; CD74; SERPINB2; FCER1G; SYK; PRKCD; RHOG; FGR; P2RX4; PECAM1; CD9; PTPN6; PFN1; DOCK2; MGLL                                                                                                                                                                                                                                                                                                                                                                                                       | 1.28E-12                |
| R-HSA-77387      | Insulin receptor recycling                                        | ATP6V1A; ATP6V1G1; ATP6V1B2; ATP6V1H; TCIRG1; ATP6V1E1; ATP6V0C; ATP6V0D2; ATP6V1D; ATP6V1C1; ATP6V0A1                                                                                                                                                                                                                                                                                                                                                                                                                                                                                                                                            | 1.67E-12                |
| R-HSA-556833     | Metabolism of lipids and lipoproteins                             | SLC25A1; ASAH1; ARF1; HEXB; HEXA; AKR1B1; HSD17B4; HSD17B11; PLD3; GM2A; CPT2; ALOX5; INPP5D; PSAP; ME1; CYP1B1; LTA4H; APOE; CD36; GPX1; GK; GPX4; ACSL1; PTGES3; IDH1; AKR1C3; ACOT13; CYP27A1; ALDH3A2; FABP5; GLB1; TBXAS1; PPT1; PLBD1; PLIN2; GLA; PI4K2A; MGLL                                                                                                                                                                                                                                                                                                                                                                             | 8.15E-12                |
| R-HSA-1280218    | Adaptive immune system                                            | ARF1; NCF1; NCF2; NCF4; ITGB2; WAS; ITGAL; IFI30; AP2A2; PSMB10; CTSS; HLA-DMB; INPP5D; PLCG2; CTSH; CD36; ATG7; B2M; CTSD; CTSB; LYN; CD74; HLA-DRB4; SYK; AP1B1; HLA-B; CYBB; CYBA; HLA-A; LILRB2; PSMB8; PTPRC; TYROBP; PSME1; HLA-DPB1; HLA-DRA; PTPN6; EVL; HLA-DRB1; RAB7A                                                                                                                                                                                                                                                                                                                                                                  | 3.17E-11                |
| R-HSA-2132295    | MHC class II antigen presentation                                 | CD74; ARF1; HLA-DRB4; AP1B1; IFI30; AP2A2; CTSS; HLA-DMB; HLA-DPB1; HLA-DRA; CTSH; CTSD; HLA-DRB1; CTSB; RAB7A                                                                                                                                                                                                                                                                                                                                                                                                                                                                                                                                    | 7.87E-10                |
| R-HSA-76002      | Platelet activation, signaling and aggregation                    | LYN; CAP1; FCER1G; SYK; PRKCD; PLEK; RHOG; GNAI3; ARRB1; GNAI2; ABHD12; CYB5R1; PSAP; PLCG2; RAC2; PECAM1; CD9; PTPN6; CD36; PFN1; MGLL                                                                                                                                                                                                                                                                                                                                                                                                                                                                                                           | 3.59E-09                |
| R-HSA-1236975    | Antigen processing-cross presentation                             | NCF1; NCF2; NCF4; HLA-B; CYBB; CYBA; HLA-A; CTSS; PSMB10; PSMB8; PSME1; CD36; B2M                                                                                                                                                                                                                                                                                                                                                                                                                                                                                                                                                                 | 5.16E-09                |
| R-HSA-1236973    | Cross-presentation of particulate exogenous antigens (phagosomes) | NCF1; NCF2; NCF4; CYBB; CYBA; CD36                                                                                                                                                                                                                                                                                                                                                                                                                                                                                                                                                                                                                | 8.39E-09                |
| R-HSA-71387      | Metabolism of carbohydrates                                       | SLC25A1; G6PD; ADPGK; GAA; HEXB; HEXA; AKR1A1; TALDO1; AKR1B1; PYGL; PGD; DERA; HK3; PC; GLB1; ALDH1A1; PGK1; MAN2B1; GUSB; FBP1; FBP2                                                                                                                                                                                                                                                                                                                                                                                                                                                                                                            | 2.10E-08                |
| R-HSA-2029480    | Fc gamma receptor (FCGR) dependent phagocytosis                   | ACTR3; LYN; CYFIP1; SYK; ARPC1B; PRKCD; WAS; PLD3; FGR; HCK; ARPC2; PLCG2; ELMO2; NCKAP1L                                                                                                                                                                                                                                                                                                                                                                                                                                                                                                                                                         | 5.19E-08                |
| R-HSA-202733     | Cell surface interactions at the vascular wall                    | LYN; CD74; CD84; FCER1G; ITGAM; ITGB2; ITGAL; INPP5D; BSG; PECAM1; ITGAX; SIRPA; PTPN6                                                                                                                                                                                                                                                                                                                                                                                                                                                                                                                                                            | 5.59E-08                |



|               |                                                                                               |                                                                                                                                                                                                                        |          |
|---------------|-----------------------------------------------------------------------------------------------|------------------------------------------------------------------------------------------------------------------------------------------------------------------------------------------------------------------------|----------|
| R-HSA-164952  | The role of Nef in HIV-1 replication and disease pathogenesis                                 | HCK; ARF1; AP1B1; ATP6V1H; HLA-A; DOCK2; AP2A2; B2M                                                                                                                                                                    | 1.06E-07 |
| R-HSA-5668599 | RHO GTPases activate NADPH oxidases                                                           | NCF1; NCF2; NCF4; RAC2; CYBB; CYBA                                                                                                                                                                                     | 3.50E-07 |
| R-HSA-3299685 | Detoxification of reactive oxygen species                                                     | PRDX3; GPX1; TXNRD2; PRDX1; GSR; CYBB; CYBA; SOD2                                                                                                                                                                      | 4.00E-07 |
| R-HSA-168249  | Innate immune system                                                                          | CYFIP1; ITGAM; ARPC1B; ITGB2; WAS; PEBP1; ARRB1; PSMB10; CTSS; PLD3; PYCARD; LGALS3; PLCG2; CASP1; NCKAP1L; CD14; CD36; B2M; CTSB; LYN; ACTR3; FCER1G; SYK; PRKCD; HLA-B; PSMB8; FGR; HCK; TYROBP; ARPC2; PSME1; ELMO2 | 3.18E-06 |
| R-HSA-195258  | RHO GTPase effectors                                                                          | ACTR3; CYFIP1; NCF1; NCF2; ARPC1B; NCF4; RHOG; WAS; CYBB; CYBA; IQGAP2; FMNL1; ARPC2; RAC2; NCKAP1L; EVL; PFN1                                                                                                         | 3.27E-06 |
| R-HSA-211859  | Biological oxidations                                                                         | GSTK1; GSTO1; MGST3; EPHX1; AKR1A1; CNDP2; CYP27A1; SULT1A1; POR; GCLC; ALDH2; TBXAS1; ALDH1A1; CYP1B1; CES1                                                                                                           | 3.59E-06 |
| R-HSA-164938  | Nef-mediate down modulation of cell surface receptors by recruiting them to clathrin adaptors | ARF1; AP1B1; ATP6V1H; HLA-A; AP2A2; B2M                                                                                                                                                                                | 7.89E-06 |
| R-HSA-2142753 | Arachidonic acid metabolism                                                                   | GPX1; GPX4; PTGES3; ALOX5; TBXAS1; AKR1C3; CYP1B1; LTA4H                                                                                                                                                               | 1.58E-05 |
| R-HSA-877300  | Interferon gamma signaling                                                                    | HLA-DRB4; PRKCD; HLA-B; HLA-DPB1; HLA-DRA; PTPN6; HLA-A; IFI30; B2M; HLA-DRB1                                                                                                                                          | 1.58E-05 |
| R-HSA-202403  | TCR signaling                                                                                 | HLA-DRB4; PTPRC; INPP5D; PSME1; HLA-DPB1; WAS; HLA-DRA; EVL; PSMB10; HLA-DRB1; PSMB8                                                                                                                                   | 1.80E-05 |
| R-HSA-194315  | Signaling by Rho GTPases                                                                      | ACTR3; CYFIP1; NCF1; NCF2; ARPC1B; NCF4; RHOG; WAS; CYBB; CYBA; GMIP; IQGAP2; FMNL1; ARPC2; ARHGDI1; RAC2; NCKAP1L; EVL; PFN1                                                                                          | 2.28E-05 |
| R-HSA-1660662 | Glycosphingolipid metabolism                                                                  | ASAH1; GM2A; GLB1; HEXB; HEXA; PSAP; GLA                                                                                                                                                                               | 2.91E-05 |
| R-HSA-70326   | Glucose metabolism                                                                            | SLC25A1; HK3; PC; ADPGK; GAA; PGK1; PYGL; FBP1; FBP2                                                                                                                                                                   | 3.04E-05 |
| R-HSA-162909  | Host Interactions of HIV factors                                                              | HCK; ARF1; AP1B1; PSME1; ATP6V1H; HLA-A; DOCK2; B2M; AP2A2; PSMB10; PSMB8                                                                                                                                              | 3.78E-05 |
| R-HSA-71336   | Pentose phosphate pathway (hexose monophosphate shunt)                                        | G6PD; TALDO1; PGD; DERA                                                                                                                                                                                                | 8.14E-05 |
| R-HSA-199992  | Trans-golgi network vesicle budding                                                           | VAMP8; ARF1; FTH1; AP1B1; M6PR; DNASE2; ARRB1; FTL                                                                                                                                                                     | 1.00E-04 |
| R-HSA-421837  | Clathrin derived vesicle budding                                                              | VAMP8; ARF1; FTH1; AP1B1; M6PR; DNASE2; ARRB1; FTL                                                                                                                                                                     | 1.00E-04 |
| R-HSA-5621480 | Dectin-2 family                                                                               | LYN; FCER1G; SYK; PLCG2                                                                                                                                                                                                | 1.22E-04 |
| R-HSA-74752   | Signaling by insulin receptor                                                                 | ATP6V1A; ATP6V1G1; PEBP1; ARRB1; TCIRG1; PSMB10; PSMB8; PSME1; ATP6V1B2; ATP6V1H; ATP6V1E1; ATP6V0D2; ATP6V0C; ATP6V1D; ATP6V1C1; ATP6V0A1                                                                             | 1.28E-04 |
| R-HSA-432720  | Lysosome vesicle biogenesis                                                                   | VAMP8; ARF1; AP1B1; M6PR; DNASE2; ARRB1                                                                                                                                                                                | 1.28E-04 |
| R-HSA-202433  | Generation of second messenger molecules                                                      | HLA-DRB4; HLA-DPB1; WAS; HLA-DRA; EVL; HLA-DRB1                                                                                                                                                                        | 1.28E-04 |
| R-HSA-114604  | GPVI-mediated activation cascade                                                              | LYN; FCER1G; SYK; RHOG; RAC2; PLCG2; PTPN6                                                                                                                                                                             | 1.28E-04 |
| R-HSA-428157  | Sphingolipid metabolism                                                                       | ALDH3A2; ASAH1; GM2A; GLB1; HEXB; PSAP; HEXA; GLA                                                                                                                                                                      | 1.29E-04 |
| R-HSA-5663213 | RHO GTPases activate WASPs and WAVEs                                                          | ACTR3; CYFIP1; ARPC2; ARPC1B; WAS; NCKAP1L                                                                                                                                                                             | 1.37E-04 |
| R-HSA-156590  | Glutathione conjugation                                                                       | GSTK1; GCLC; GSTO1; MGST3; AKR1A1; CNDP2                                                                                                                                                                               | 1.85E-04 |
| R-HSA-210990  | PECAM1 interactions                                                                           | LYN; INPP5D; PECAM1; PTPN6                                                                                                                                                                                             | 2.23E-04 |
| R-HSA-1236977 | Endosomal/vacuolar pathway                                                                    | HLA-B; HLA-A; B2M; CTSS                                                                                                                                                                                                | 2.23E-04 |
| R-HSA-202427  | Phosphorylation of CD3 and TCR zeta chains                                                    | PTPRC; HLA-DRB4; HLA-DPB1; HLA-DRA; HLA-DRB1                                                                                                                                                                           | 2.26E-04 |
| R-HSA-913531  | Interferon signaling                                                                          | HLA-DRB4; PRKCD; HLA-B; HLA-DPB1; HLA-DRA; PTPN6; HLA-A; IFI30; SAMHD1; B2M; HLA-DRB1; PSMB8                                                                                                                           | 2.66E-04 |
| R-HSA-1280215 | Cytokine signaling in immune system                                                           | LYN; HLA-DRB4; SYK; PRKCD; HLA-B; PEBP1; ARRB1; IL16; HLA-A; IFI30; SAMHD1; PSMB8; PSMB10; HCK; INPP5D; PSME1; HLA-DPB1; CASP1; HLA-DRA; PTPN6; LGALS9; B2M; HLA-DRB1                                                  | 2.69E-04 |

|               |                                                                               |                                                                                                                                                                                                                                                                                                                                                                                                                     |          |
|---------------|-------------------------------------------------------------------------------|---------------------------------------------------------------------------------------------------------------------------------------------------------------------------------------------------------------------------------------------------------------------------------------------------------------------------------------------------------------------------------------------------------------------|----------|
| R-HSA-389948  | PD-1 signaling                                                                | HLA-DRB4; HLA-DPB1; HLA-DRA; PTPN6; HLA-DRB1                                                                                                                                                                                                                                                                                                                                                                        | 3.20E-04 |
| R-HSA-211945  | Phase 1 - functionalization of compounds                                      | CYP27A1; POR; ALDH2; EPHX1; ALDH1A1; TBXAS1; CYP1B1; CES1                                                                                                                                                                                                                                                                                                                                                           | 5.22E-04 |
| R-HSA-5621481 | C-type lectin receptors (CLRs)                                                | PYCARD; LYN; FCER1G; SYK; PRKCD; PSME1; PLCG2; PSMB10; PSMB8                                                                                                                                                                                                                                                                                                                                                        | 6.60E-04 |
| R-HSA-2029482 | Regulation of actin dynamics for phagocytic cup formation                     | ACTR3; CYFIP1; ARPC2; SYK; ARPC1B; WAS; ELMO2; NCKAP1L                                                                                                                                                                                                                                                                                                                                                              | 7.18E-04 |
| R-HSA-202424  | Downstream TCR signaling                                                      | HLA-DRB4; INPP5D; PSME1; HLA-DPB1; HLA-DRA; PSMB10; HLA-DRB1; PSMB8                                                                                                                                                                                                                                                                                                                                                 | 8.12E-04 |
| R-HSA-70263   | Gluconeogenesis                                                               | SLC25A1; PC; PGK1; FBP1; FBP2                                                                                                                                                                                                                                                                                                                                                                                       | 8.12E-04 |
| R-HSA-2173782 | Binding and uptake of ligands by scavenger receptors                          | CD163; FTH1; STAB1; HBB; CD36; APOE; FTL                                                                                                                                                                                                                                                                                                                                                                            | 8.17E-04 |
| R-HSA-432722  | Golgi associated vesicle biogenesis                                           | VAMP8; ARF1; FTH1; AP1B1; ARRB1; FTL                                                                                                                                                                                                                                                                                                                                                                                | 1.07E-03 |
| R-HSA-983169  | Class I MHC mediated antigen processing & presentation                        | NCF1; NCF2; NCF4; HLA-B; CYBB; CYBA; HLA-A; PSMB10; CTSS; PSMB8; PSME1; CD36; B2M; ATG7                                                                                                                                                                                                                                                                                                                             | 1.07E-03 |
| R-HSA-114608  | Platelet degranulation                                                        | CAP1; CYB5R1; PSAP; PLEK; PECAM1; CD9; CD36; PFN1                                                                                                                                                                                                                                                                                                                                                                   | 1.13E-03 |
| R-HSA-983712  | Ion channel transport                                                         | ATP6V1A; ATP6V1G1; ATP6V1B2; ATP6V1H; TCIRG1; ATP6V1E1; ATP6V0D2; ATP6V0C; ATP6V1D; ATP6V1C1; ATP6V0A1                                                                                                                                                                                                                                                                                                              | 1.36E-03 |
| R-HSA-76005   | Response to elevated platelet cytosolic Ca <sup>2+</sup>                      | CAP1; CYB5R1; PSAP; PLEK; PECAM1; CD9; CD36; PFN1                                                                                                                                                                                                                                                                                                                                                                   | 1.51E-03 |
| R-HSA-4420097 | VEGFA-VEGFR2 pathway                                                          | CYFIP1; NCF1; NCF2; PRKCD; NCF4; PEBP1; CYBB; CYBA; ARRB1; PSMB10; PSMB8; PSME1; ELMO2; NCKAP1L                                                                                                                                                                                                                                                                                                                     | 1.65E-03 |
| R-HSA-202430  | Translocation of ZAP-70 to immunological synapse                              | HLA-DRB4; HLA-DPB1; HLA-DRA; HLA-DRB1                                                                                                                                                                                                                                                                                                                                                                               | 1.72E-03 |
| R-HSA-194138  | Signaling by VEGF                                                             | CYFIP1; NCF1; NCF2; PRKCD; NCF4; PEBP1; CYBB; CYBA; ARRB1; PSMB10; PSMB8; PSME1; ELMO2; NCKAP1L                                                                                                                                                                                                                                                                                                                     | 2.02E-03 |
| R-HSA-196854  | Metabolism of vitamins and cofactors                                          | CYB5A; PDXK; PC; GSTO1; MCCC1; NAMPT; AKR1C3; ACP5; APOE                                                                                                                                                                                                                                                                                                                                                            | 2.12E-03 |
| R-HSA-6788656 | Histidine, lysine, phenylalanine, tyrosine, proline and tryptophan catabolism | IL4I1; KYNU; FAH; HNMT; ASRGL1                                                                                                                                                                                                                                                                                                                                                                                      | 2.22E-03 |
| R-HSA-162582  | Signal transduction                                                           | VPS29; CYFIP1; NCF1; NCF2; ARPC1B; NCF4; PEBP1; ARRB1; TCIRG1; AP2A2; ABHD12; HEBP1; ARHGDI1; RAC2; ATP6V1E1; ACTR3; ATP6V1G1; SYK; PRKCD; RHOG; ADAM10; CYBB; CYBA; GMIP; ALDH1A1; ATP6V1B2; PSME1; ELMO2; EVL; PFN1; ATP6V0D2; ATP6V0C; MGLL; ATP6V1A; GNAI3; WAS; IQGAP2; PSMB10; GNAI2; GPNMB; PSAP; ATP6V1H; NCKAP1L; APOE; ATP6V1D; ATP6V1C1; ATP6V0A1; LYN; PDHA1; AKR1C3; PSMB8; FMNL1; ARPC2; FABP5; PTPN6 | 2.30E-03 |
| R-HSA-71291   | Metabolism of amino acids and derivatives                                     | PDHA1; MCCC1; GSR; SQRDL; FAH; HNMT; ASRGL1; PSMB10; PSMB8; CNDP2; IL4I1; GCLC; KYNU; PSME1                                                                                                                                                                                                                                                                                                                         | 2.36E-03 |
| R-HSA-1236974 | ER-phagosome pathway                                                          | HLA-B; PSME1; HLA-A; B2M; PSMB10; PSMB8                                                                                                                                                                                                                                                                                                                                                                             | 2.43E-03 |
| R-HSA-162906  | HIV infection                                                                 | HCK; ARF1; AP1B1; PSME1; ATP6V1H; HLA-A; DOCK2; B2M; AP2A2; PSMB10; PSMB8                                                                                                                                                                                                                                                                                                                                           | 2.45E-03 |
| R-HSA-216083  | Integrin cell surface interactions                                            | ITGAM; BSG; ITGB2; PECAM1; ITGAX; ITGAL                                                                                                                                                                                                                                                                                                                                                                             | 2.75E-03 |
| R-HSA-422475  | Axon guidance                                                                 | LYN; ACTR3; CAP1; ARPC1B; RHOG; ADAM10; PEBP1; ARRB1; AP2A2; PSMB8; PSMB10; PTPRC; TYROBP; ARPC2; PSME1; RAC2; EVL; PFN1                                                                                                                                                                                                                                                                                            | 2.80E-03 |
| R-HSA-196849  | Metabolism of water-soluble vitamins and cofactors                            | CYB5A; PDXK; PC; GSTO1; MCCC1; NAMPT; ACP5                                                                                                                                                                                                                                                                                                                                                                          | 3.45E-03 |
| R-HSA-5607764 | CLEC7A (Dectin-1) signaling                                                   | PYCARD; SYK; PRKCD; PSME1; PLCG2; PSMB10; PSMB8                                                                                                                                                                                                                                                                                                                                                                     | 3.62E-03 |
| R-HSA-109581  | Apoptosis                                                                     | BCAP31; GSN; PRKCD; PSME1; DSG1; CD14; BID; PSMB10; PSMB8                                                                                                                                                                                                                                                                                                                                                           | 3.64E-03 |
| R-HSA-156580  | Phase II conjugation                                                          | SULT1A1; GSTK1; GCLC; GSTO1; MGST3; AKR1A1; CNDP2                                                                                                                                                                                                                                                                                                                                                                   | 3.70E-03 |
| R-HSA-388841  | Costimulation by the CD28 family                                              | LYN; HLA-DRB4; HLA-DPB1; HLA-DRA; PTPN6; HLA-DRB1                                                                                                                                                                                                                                                                                                                                                                   | 3.70E-03 |
| R-HSA-5357801 | Programmed cell death                                                         | BCAP31; GSN; PRKCD; PSME1; DSG1; CD14; BID; PSMB10; PSMB8                                                                                                                                                                                                                                                                                                                                                           | 3.81E-03 |

**Table S4. Cytokine production by FCs and VFFs, cultured under basal conditions for 24 hours.** Raw concentrations (pg/mL) are shown as a single value per cytokine, assayed using pooled culture supernatant ( $n = 6$  per condition) and a multiplexed protein array. Serum-free medium was used as a negative control. Log<sub>2</sub>-transformed fold change data (FC versus VFF) are presented in Fig. 5C.

| Cell population              | IL5               | IL2  | IFNG | IL4 | IL13 | IL6  | CSF2 | IL10 | TNF  | CXCL8 |
|------------------------------|-------------------|------|------|-----|------|------|------|------|------|-------|
| FC                           | 0.3               | 17.4 | 22.7 | 1.6 | 3.4  | 12.6 | 2.0  | 7.8  | 24.0 | 77.5  |
| VFF                          | n.d. <sup>a</sup> | 15.1 | 18.0 | 1.0 | 2.0  | 4.8  | 0.7  | 2.7  | 8.0  | 0.4   |
| Serum-free medium (no cells) | n.d. <sup>a</sup> | 13.4 | 14.5 | 1.0 | 2.2  | 1.1  | 1.9  | 4.4  | 14.3 | 0.2   |

<sup>a</sup> n.d., not detected.

**Table S5. Antibodies and isotype controls used for flow cytometry.**

| Item                                           | Clone      | Fluorochrome | Dilution | Manufacturer             | Catalog number |
|------------------------------------------------|------------|--------------|----------|--------------------------|----------------|
| <i>Primary antibodies</i>                      |            |              |          |                          |                |
| rabbit anti-human prolyl-4-hydroxylase $\beta$ | polyclonal | FITC         | 1:50     | Bioss                    | bs-5090R-FITC  |
| rabbit anti-human prolyl-4-hydroxylase $\beta$ | polyclonal | PE           | 1:50     | Bioss                    | bs-5090R-PE    |
| mouse anti-human E-cadherin (CD324)            | 67A4       | PerCP        | 1:5      | Santa Cruz Biotechnology | sc-21791 PerCP |
| mouse anti-human CD11b                         | ICRF44     | Alexa 488    | 1:20     | BD Biosciences           | 557701         |
| mouse anti-human CD11b                         | ICRF44     | Alexa 700    | 1:20     | BD Biosciences           | 557918         |
| mouse anti-human CD11b                         | ICRF44     | APC          | 1:20     | BD Biosciences           | 550019         |
| mouse anti-human CD14                          | M5E2       | PE-Cy7       | 1:20     | BD Biosciences           | 557742         |
| mouse anti-human CXCR4 (CD184)                 | 12G5       | PE           | 1:100    | Santa Cruz Biotechnology | sc-12764 PE    |
| mouse anti-human CD16                          | LNK16      | FITC         | 1:20     | Santa Cruz Biotechnology | sc-51524 FITC  |
| mouse anti-human CD16                          | 3G8        | FITC         | 1:5      | BD Bioscience            | 555406         |
| mouse anti-human CD29                          | MAR4       | PE-Cy5       | 1:5      | BD Biosciences           | 559882         |
| mouse anti-human CD105                         | SN6        | PE           | 1:50     | eBioscience              | 12-1057-41     |
| mouse anti-human CD34                          | 8G12       | PE-Cy7       | 1:20     | BD Biosciences           | 348791         |
| mouse anti-human keratin 5                     | XM26       | none         | 1:20     | Santa Cruz Biotechnology | sc-58732       |
| goat anti-human $\Delta$ N-TP63                | polyclonal | none         | 1:100    | Santa Cruz Biotechnology | sc-8609        |
| <i>Secondary antibodies</i>                    |            |              |          |                          |                |
| Alexa 647-conjugated donkey anti-mouse IgG     |            | Alexa 647    | 1:200    | Life Technologies        | A-31571        |
| Alexa 594-conjugated donkey anti-goat IgG      |            | Alexa 594    | 1:200    | Life Technologies        | A-11058        |
| <i>Isotype controls</i>                        |            |              |          |                          |                |
| rabbit IgG                                     | EPR25A     | none         | 1:100    | Abcam                    | ab172730       |
| mouse IgG1                                     | ICIGG1     | none         | 1:200    | Abcam                    | ab91353        |
|                                                | MOPC-21    | APC          | 1:20     | BioLegend                | 400121         |
|                                                | MOPC-21    | FITC         | 1:20     | BioLegend                | 400107         |
|                                                | MOPC-21    | PE           | 1:20     | BioLegend                | 400111         |
| mouse IgG2b                                    | MPC-11     | APC          | 1:20     | BioLegend                | 400321         |
|                                                | MPC-11     | PE           | 1:20     | BioLegend                | 400314         |
| goat IgG                                       | polyclonal | FITC         | 1:20     | Abcam                    | ab37374        |

**Table S6. Antibodies and phalloxin used for immunocytochemistry and immunohistochemistry.**

| Item                                          | Clone      | Dilution | Manufacturer         | Catalog number | Positive control |
|-----------------------------------------------|------------|----------|----------------------|----------------|------------------|
| <i>Primary antibodies</i>                     |            |          |                      |                |                  |
| mouse anti-human prolyl-4-hydroxylase $\beta$ | 3-2B12     | 1:250    | Chemicon             | MAB2701        | vocal fold       |
| Alexa 488-conjugated mouse anti-human CD11b   | ICRF44     | 1:50     | BD Biosciences       | 557701         | monocytes        |
| rabbit anti-rat CD3                           | polyclonal | 1:500    | Abcam                | ab5690         | spleen           |
| mouse anti-human Ki67                         | 4A1        | 1:200    | Invitrogen           | MA5-15525      | fibroblasts      |
| mouse anti-human keratin 5/8                  | RCK102     | 1:100    | BD Biosciences       | 550505         | skin             |
| mouse anti-human protein tyrosine kinase 2    | 4.47       | 1:200    | LifeSpan Biosciences | LS-B212        | fibroblasts      |
| <i>Secondary antibodies</i> <sup>a</sup>      |            |          |                      |                |                  |
| Alexa 488-conjugated donkey anti-mouse IgG    |            | 1:200    | Life Technologies    | A-21202        |                  |
| Alexa 594-conjugated donkey anti-mouse IgG    |            | 1:200    | Life Technologies    | A-21203        |                  |
| <i>Phalloxin</i>                              |            |          |                      |                |                  |
| rhodamine phalloidin (F-actin)                |            | 1:200    | Invitrogen           | R415           | fibroblasts      |

<sup>a</sup> Secondary antibodies used for fluorescent detection are listed here; HRP-based detection is described in Materials and Methods.
